# Chaotic Motifs in Gene Regulatory Networks

Zhaoyang Zhang<sup>1</sup>, Weiming Ye<sup>1,2</sup>, Yu Qian<sup>3</sup>, Zhigang Zheng<sup>1</sup>, Xuhui Huang<sup>1\*</sup>, Gang Hu<sup>1\*</sup>

**1** Department of Physics, Beijing Normal University, Beijing, China, **2** School of Management, Beijing Normal University, Beijing, China, **3** Nonlinear Research Institute, Baoji University of Arts and Sciences, Baoji, China

## Abstract

Chaos should occur often in gene regulatory networks (GRNs) which have been widely described by nonlinear coupled ordinary differential equations, if their dimensions are no less than 3. It is therefore puzzling that chaos has never been reported in GRNs in nature and is also extremely rare in models of GRNs. On the other hand, the topic of motifs has attracted great attention in studying biological networks, and network motifs are suggested to be elementary building blocks that carry out some key functions in the network. In this paper, chaotic motifs (subnetworks with chaos) in GRNs are systematically investigated. The conclusion is that: (i) chaos can only appear through competitions between different oscillatory modes with rivaling intensities. Conditions required for chaotic GRNs are found to be very strict, which make chaotic GRNs extremely rare. (ii) Chaotic motifs are explored as the simplest few-node structures capable of producing chaos, and serve as the intrinsic source of chaos of random few-node GRNs. Several optimal motifs causing chaos with atypically high probability are figured out. (iii) Moreover, we discovered that a number of special oscillators can never produce chaos. These structures bring some advantages on rhythmic functions and may help us understand the robustness of diverse biological rhythms. (iv) The methods of dominant phase-advanced driving (DPAD) and DPAD time fraction are proposed to quantitatively identify chaotic motifs and to explain the origin of chaotic behaviors in GRNs.

**Citation:** Zhang Z, Ye W, Qian Y, Zheng Z, Huang X, et al. (2012) Chaotic Motifs in Gene Regulatory Networks. PLoS ONE 7(7): e39355. doi:10.1371/journal.pone.0039355

**Editor:** Jürgen Kurths, Humboldt University, Germany

**Received:** February 23, 2012; **Accepted:** May 19, 2012; **Published:** July 6, 2012

**Copyright:** © 2012 Zhang et al. This is an open-access article distributed under the terms of the Creative Commons Attribution License, which permits unrestricted use, distribution, and reproduction in any medium, provided the original author and source are credited.

**Funding:** This work was supported by the National Natural Science Foundation of China under Grant No. 10975015, 11174034 and 11105003 and the Fundamental Research Funds for the Central Universities. The funders had no role in study design, data collection and analysis, decision to publish, or preparation of the manuscript.

**Competing Interests:** The authors have declared that no competing interests exist.

\* E-mail: hxhonest@gmail.com (XH); ganghu@bnu.edu.cn (GH)

## Introduction

In systems biology, gene regulatory networks (GRNs), a kind of biochemical regulatory networks, are widely described by coupled differential equations (ODEs) [1–9]. These ODEs are strongly nonlinear and often high-dimensional. Meanwhile, gene regulatory networks also share some common characteristics and network structures. For instance, positive feedback loops (PFLs) and negative feedback loops (NFLs) have been identified in various biochemical regulatory networks and found to be important control modes in GRNs. It has been demonstrated that NFLs can act as noise suppressors [6–8], oscillators [4,6–9], and linearizers [8], and PFLs can behave as switches and memory modules [7,10–13]. Since multiple and coupled oscillators are likely to be common companions in the intricate GRNs [4], complex nonlinear dynamic behaviors, such as self-sustained oscillation, birhythmicity, bursting oscillation and even chaos, are reasonably expected for these objects [2,14–19].

According to our understanding on the theory of nonlinear dynamical systems, strongly coupled high dimensional ODEs are very likely to show chaotic behaviors. Especially, chaos has been found in some chemical reactions both in experiments and simulations, such as the Peroxidase-Oxidase reaction [20–23] and the Belousov-Zhabotinsky reaction [23–26]. Therefore, chaos may occur often in  $n$ -dimensional ( $n$ D) GRNs with  $n \geq 3$ . However, chaos is extremely rare in GRNs and have seldom reported with  $n=3$  [18,27]. These results are surely

beneficial from biological viewpoint, however, the reason for this rareness has still not been fully understood [15–17,19].

Recently, the topic of motifs has attracted great interest in studying biological networks [28–32]. Network motifs are subgraphs appearing in some biological networks far more often than in randomized networks and they are suggested to be elementary building blocks that carry out some key functions in the network. Various types of motifs producing some simple functions have been explored and studied, such as sign-sensitive accelerators or delays of feed-forward loop [30], tunable biological oscillations of coupled NFL and PFL [13], and so on.

Dynamical motifs (subnetworks with nontrivial dynamics) have been presented as a new approach to the study of the dynamics in networks [33]. We apply the concept of motifs to investigate the chaotic dynamics in GRNs. Chaotic motifs are those minimal structures with the simplest interactions that can generate chaos. It has been demonstrated that complex oscillatory behavior, such as birhythmicity, bursting and chaos, is due to the competition between two oscillatory mechanism with a comparable importance [2,4,17]. Chaos has also been found in a simple three-variable biochemical system, which is only comprised of two feedback loops [18]. However, it is still unclear that, in what degree network structures can determine the existence of chaotic behaviors in GRNs. In other words, there is no general conclusion on the relationship between network structures and chaotic dynamics so far.

In this paper, we concentrate on chaotic behaviors of autonomous GRNs and address the above issues by answering

the following questions: considering the crucial conditions for chaos in GRNs, why chaos is so rare; and are there some simple patterns namely chaotic motifs in complex GRNs serve as the basic building blocks for chaotic motions. We extensively search for chaos in low-dimensional GRNs ( $nD$  with  $n=3, 4$  and  $5$ ) and study the mechanism of chaos. The key results of our study are: we do find various chaotic motifs which behave as the minimal building blocks or subnetworks related to chaotic motions, where competitions between different oscillatory modes serve as the necessary condition for chaos. Based on the competition idea, we reveal the conditions under which chaos can be easily found, even we can readily explore some chaotic 3D GRNs where chaos has never been reported in the previous investigations. Furthermore, a number of special structures are discovered which can never generate chaos, and these structures may be related to different biological oscillators which bring some advantages on rhythmic functions avoiding chaotic motions definitely. Finally, we apply the methods of dominant phase-advanced driving (DPAD) [34,35] and DPAD time fraction to give some quantitative measurements explaining the above results on chaotic GRNs.

## Results

### Rareness of Chaos

We search chaotic motions extensively in low dimensional GRNs described by ODEs (refer to Materials and Methods for the detail of the model and searching). Each case ( $nD$  with  $n=3, 4$  and  $5$ , respectively) has  $1 \times 10^6$  samples from random network structures, parameter distributions and initial variable conditions. The asymptotic states are finally recorded. The states are classified into three different types: steady states, periodic oscillations and chaotic motions. The results are presented in Table 1. It is observed that while most of the tests approach to steady states, much less (but still many) tend to periodic oscillations. The asymptotic chaotic states are extremely rare indeed.

Now, our next task is to enlarge the chaotic samples for detailed investigation of chaotic GRNs. The following strategies are applied: (i) Some period- $m$  (called  $mp$ ) states with  $m > 1$  are discovered in the above periodic oscillations. With the clues of all these  $mp$  states, chaotic solutions can be easily obtained by continually varying parameters (various bifurcation sequences to chaos). Therefore, all the  $mp$  states with  $m > 1$  will be simply classified as chaotic solutions in the following investigations. (ii) Since the existence of oscillation is a necessary condition for chaos, much more effective searching can be made among all these periodic GRNs. In Table 2, we search for chaos in the way exactly the same as in Table 1 by randomly choosing parameters and initial conditions but within the classes of periodic networks in Table 1. In Table 2, considerably richer chaotic behaviors are

**Table 1.** Attractor distributions in random GRNs.

| Random      | 3-node | 4-node | 5-node |
|-------------|--------|--------|--------|
| Oscillation | 1.233% | 1.775% | 2.432% |
| Chaos       | 1      | 20     | 42     |

Asymptotic states reached by  $10^6$  tests with random network structures, parameter distributions and initial variable conditions for  $nD$  GRNs with  $n=3, 4$  and  $5$ . The asymptotic states are classified into three types: steady, periodic oscillatory and chaotic states. Most tests tend to stable steady states and much less periodic oscillations. The probability of oscillations is computed out, and the amount of chaotic samples is counted out of every  $10^6$  tests. The asymptotic chaotic states are extremely rare indeed.  
doi:10.1371/journal.pone.0039355.t001

**Table 2.** Attractor distributions in oscillatory networks in Table 1.

| Periodic    | 3-node  | 4-node  | 5-node  |
|-------------|---------|---------|---------|
| Oscillation | 41.157% | 40.158% | 39.310% |
| Chaos       | 195     | 1158    | 1591    |

The same as Table 1 with all data measured within the network structures of periodic oscillations in Table 1. Since the existence of oscillation is a necessary condition for chaos, much more effective searching can be made among all the periodic GRNs. Obviously, we do observe considerably richer chaotic behaviors than that of Table 1. The amount of chaotic samples is also counted out of every  $10^6$  tests, and all these chaotic samples will be used in the following for studying the mechanism of chaos.  
doi:10.1371/journal.pone.0039355.t002

observed than that of Table 1, and all these samples can be used for studying the mechanism of chaos in GRNs.

It can be inferred from Table 2 that oscillations in our model are rather robust against parameter sets. More than forty percent of the samples from periodic network structures in Table 1 remain in oscillatory states by randomly varying parameters and initial variable conditions.

### Introduction to Chaotic Motifs

We analyze the chaotic behaviors of some chaotic samples in Table 2 to study the mechanism of chaos. A 3-node GRN is plotted in Fig.1A which can exhibit chaos by varying parameters shown in Fig.1B. A chaotic attractor of this GRN is presented in Fig.1C. Let us consider a biologically relevant problem which interactions in Fig.1A are crucial for chaos, or in other words, what is the minimal structure of Fig.1A to produce chaos. In order to do this, different interactions are deleted in different tests and the structure of Fig.1D is found finally by deleting a single interaction  $3 \rightarrow 1$  from Fig.1A (solid (dashed) arrows denote active (repressive) interactions), in which chaos can be still maintained. Further deleting any cross coupling (cross refers to interaction between different nodes) from Fig.1D can definitely suppress chaos no matter how to vary system parameters, initial conditions and self-regulations. It is interesting that the two GRNs in Figs.1A and 1D show similar types of bifurcation sequences to chaos (Figs.1B and 1E) and persist alike chaotic attractors (Figs.1C and 1F). These observations illustrate that the deleted interaction from Fig.1A to Fig.1D is not essential for the chaotic behaviors of Figs.1B and 1C. Conversely, the remaining cross interactions (the two feedback loops) in Fig.1D are all crucial for chaotic motion. Therefore, we consider all the minimal structures of cross interactions similar to Fig.1D as 3-node chaotic motifs of GRNs, in which removing any single cross interaction can surely destroy chaos.

Similar concept can be also defined for 4-node GRNs. In Fig.2, we do exactly the same as Fig.1 with three 4-node GRNs (Figs.2A-2C) considered. From Fig.2A to Fig.2B and from Fig.2B to Fig.2C, we delete two interactions  $1 \rightarrow 2$  and  $3 \rightarrow 2$  and another interaction  $1 \rightarrow 3$  (blue lines in the GRNs). All the three GRNs display similar bifurcation sequences to chaos (Figs.2D-2F) and persist alike chaotic attractors (Figs.2G-2I). These observations demonstrate again that the deleted interactions are not essential for chaos. It is found further that all the cross interactions in Fig.2C are crucial for chaos, and removing any of them can entirely suppress chaos. We consider the cross interacted structure of Fig.2C and all similar minimal 4-node subnetworks as 4-node chaotic motifs.

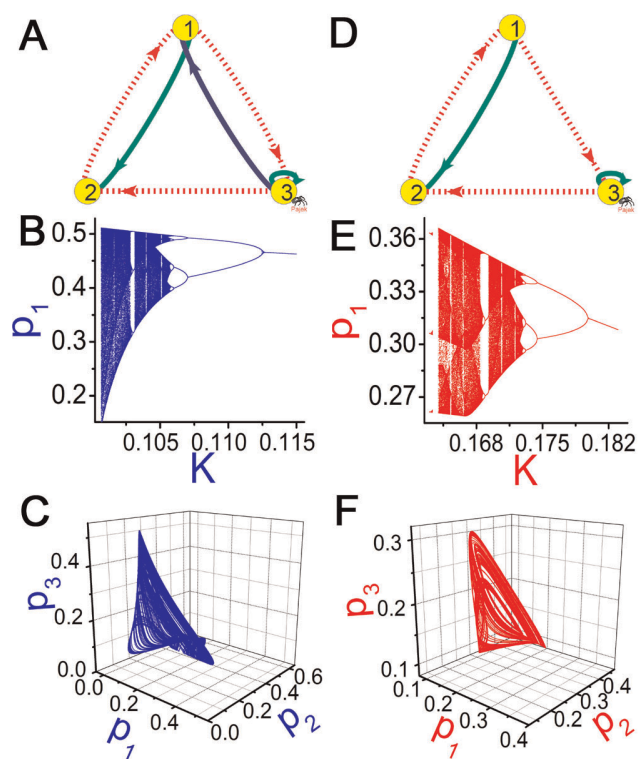

**Figure 1. A 3-node chaotic motif.** A, D: Two 3-node chaotic GRNs. Solid (dashed) lines denote active (repressive) regulations. B, E: Bifurcation diagrams of A and D, respectively (peak values of  $p_1$  plotted as functions of  $K$  with  $h=3.00$ ). C, F: Chaotic attractors (C for A with  $K=0.102$ , F for D with  $K=0.165$ ). From A to D, we discard a single interaction ( $3 \rightarrow 1$ , blue line in A). The removal does not essentially affect the chaotic motion. The bifurcation diagrams and the chaotic attractors of the two GRNs in A and D are similar. On the other hand, all the cross interactions in D (cross refers to interaction between different nodes) are irreducible, and removal of any of them can surely suppress chaos no matter how to adjust the parameters, initial conditions and self-regulations of different nodes. The cross interaction structure of D is identified as a 3-node chaotic motif.  
doi:10.1371/journal.pone.0039355.g001

### Conditions for Chaotic Motifs

It is of special importance to investigate what kinds of GRNs can serve as chaotic motifs. We define chaotic motifs as those irreducible chaotic subnetworks which have the fewest feedback loops and the least cross interactions (such as GRNs of Figs.1D and 2C). In each chaotic motif, the cross interactions are all crucial for chaotic behaviors, in another words, chaos would be lost by removing any of the cross interactions, no matter how to vary system parameters, initial conditions and self-regulations. Therefore, a basic motif is just defined as the structure of the cross interactions.

Some necessary conditions for chaotic motifs can be reasonably expected. The first crucial requirement of chaos is the competition between two or more oscillatory modes [2,4,19]. It is more or less known that feedback loops may represent different oscillatory modes in GRNs [6,8,9,12,18,36]. Therefore, the existence of at least two feedback loops in GRNs, generating different oscillatory modes in competition, must be fulfilled by chaotic GRNs. Moreover, self-sustained oscillation is also a basic condition for chaos. Since the absolutely necessary condition for self-sustained oscillation of GRNs is existence of, at least, a NFL [4,7,9], and this is the second condition for chaos.

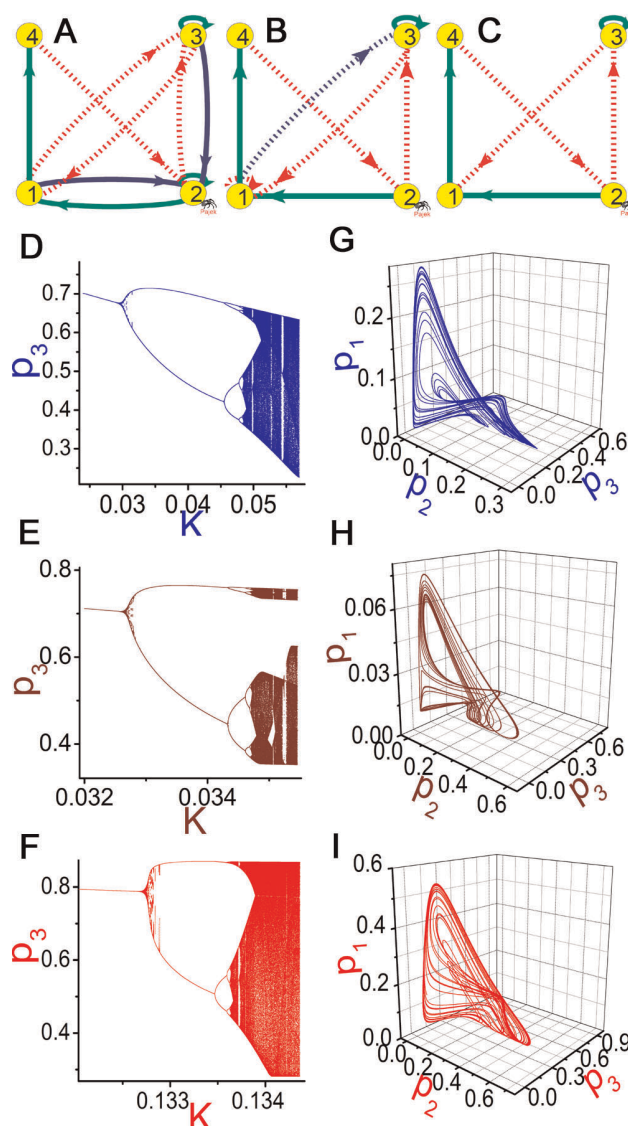

**Figure 2. A 4-node chaotic motif.** The same as Fig.1 with three 4-node GRNs considered. A-C: The GRNs under investigations. D-F: Their corresponding bifurcation diagrams (D for A with  $h=2.00$ ; E for B with  $h=2.35$ ; F for C with  $h=2.50$ ). G-I: The corresponding chaotic attractors (G for A with  $K=0.053$ ; H for B with  $K=0.0354$ ; I for C with  $K=0.134$ ). From A to B the interactions  $1 \rightarrow 2$  and  $3 \rightarrow 2$  are removed, and from B to C the interaction  $1 \rightarrow 3$  is deleted. These deletions do not essentially affect the chaotic motions. All bifurcation diagrams to chaos (D-F) and chaotic attractors of the three GRNs (G-I) are similar. Network C is irreducible for chaos in the sense that removal of any cross interaction of it can absolutely terminate chaos. The cross interaction structure of C is thus considered as a 4-node chaotic motif.  
doi:10.1371/journal.pone.0039355.g002

Therefore, all the chaotic motifs may possess the following two characteristic features: (i) All these motifs have two feedback loops (the fewest feedback loops for chaotic motifs); (ii) At least one of the two loops is NFL. We exhaustively search all 3-node and 4-node GRNs with minimal (irreducible) interactions satisfying the above two conditions, and eventually find 19 distinct 3-node and 86 distinct 4-node candidates of chaotic motifs. Fig. S1 shows a complete list of all these 105 two-loop structures (TLSs).

With all the 105 TLSs, we can do the same as in Table 1 to search for chaos. A number of chaotic motifs are discovered after  $1 \times 10^6$  tests for each TLS by varying system parameters, initial

**Table 3.** Attractor distributions in chaotic motifs.

| Motif              | (1)    | (4)    | (7)     | (8)    | (9)    | (11)    | (12)    | (15)    |
|--------------------|--------|--------|---------|--------|--------|---------|---------|---------|
| <b>Oscillation</b> | 0.119% | <0.10% | <0.10%  | 0.127% | 3.891% | 1.963%  | 4.062%  | 5.375%  |
| <b>Chaos</b>       | 16     | 1      | 1       | 2      | 10     | 373     | 103     | 7       |
| Motif              | (16)   | (17)   | (19)    | (20)   | (21)   | (23)    | (24)    | (25)    |
| <b>Oscillation</b> | 4.414% | 4.512% | 8.105%  | 4.915% | 2.634% | 4.370%  | 5.366%  | 0.158%  |
| <b>Chaos</b>       | 1145   | 20     | 12      | 11     | 1      | 469     | 252     | 16      |
| Motif              | (26)   | (28)   | (29)    | (30)   | (32)   | (34)    | (35)    | (39)    |
| <b>Oscillation</b> | 8.091% | 1.926% | <0.10%  | <0.10% | 0.153% | 4.735%  | 3.254%  | 3.844%  |
| <b>Chaos</b>       | 15     | 12     | 1       | 1      | 4      | 73      | 49      | 65      |
| Motif              | (40)   | (41)   | (44)    | (46)   | (48)   | (52)    | (54)    | (56)    |
| <b>Oscillation</b> | 3.242% | 3.848% | 5.006%  | 5.703% | 4.552% | 9.295%  | 10.164% | 11.016% |
| <b>Chaos</b>       | 1      | 54     | 158     | 198    | 928    | 1       | 1       | 32      |
| Motif              | (58)   | (59)   | (61)    | (63)   | (65)   | (67)    | (70)    | (72)    |
| <b>Oscillation</b> | 2.204% | 1.469% | 4.570%  | 3.634% | 9.760% | 10.321% | 6.316%  | 5.283%  |
| <b>Chaos</b>       | 111    | 41     | 12      | 283    | 3      | 19      | 123     | 1       |
| Motif              | (73)   | (74)   | (77)    | (78)   | (79)   | (80)    | (82)    | (83)    |
| <b>Oscillation</b> | 5.730% | 2.137% | 10.803% | 6.704% | 1.321% | 2.530%  | 10.925% | 12.067% |
| <b>Chaos</b>       | 15     | 5      | 33      | 2      | 5      | 9       | 1       | 29      |
| Motif              | (87)   | (92)   | (95)    | (100)  | (103)  | (104)   | (105)   |         |
| <b>Oscillation</b> | 5.487% | 5.825% | <0.10%  | 0.448% | <0.10% | <0.10%  | 0.158%  |         |
| <b>Chaos</b>       | 16     | 182    | 15      | 22     | 1      | 1       | 6       |         |

Classifications of asymptotic states reached by  $10^6$  tests for each of the 105 TLSs in Fig. S1 with random parameter distributions, initial variable conditions and self-regulations. TFLs which can produce chaos (chaotic motifs) in the above tests are listed in the Table. More motifs can be found with more extensive searching among the rest of TFLs, however, their probability is extremely low. The amount of chaos is counted out of every  $10^6$  tests. The indexes of the motifs are given in Fig. S1. doi:10.1371/journal.pone.0039355.t003

conditions and self-regulations of the structure randomly. Asymptotic state distributions of the chaotic motifs in the random tests are shown in Table 3. Besides, some significant chaotic motifs are shown in Fig.3 which show, among  $10^6$  random tests, more than 100 chaotic realizations in Table 3.

With further investigation on the network structures of the chaotic motifs in Fig.3 and Table 3, two additional characteristic features for chaotic motifs are discovered: (iii) If a motif contains one NFL and one PFL, the PFL must contain at least one node not included in the NFL. (iv) In most of the chaotic motifs in Fig.3 and Table 3, there is one node which is regulated by joint cross interactions of both active and repressive couplings.

Extensive numerical simulations with these 105 TLSs show that items (i)–(iii) are necessary conditions for chaotic motifs ( $1 \times 10^8$  random tests have been made, none of these chaotic samples violates any of the three conditions). Condition (iv) is not the necessary condition for chaotic motifs. Specifically, we can distinguish all the TLSs which satisfy all conditions (i)–(iii) into three types, type 1: satisfy condition (iv) with a node regulated jointly by an active and repressive interactions; type 2: violate condition (iv), with two NFLs; type 3: violate condition (iv), with one NFL and one PFL. Within all the chaotic subnetworks discovered in Table 3, we found that type 1 has 74.17% probability; type 2, 25.28%; while type 3, <0.6%. We found numerically that conditions (i)–(iv) comprise the sufficient conditions for 3-node and 4-node chaotic motifs, in other words, all the TLSs which satisfy the four conditions (i)–(iv) can generate chaotic motions with suitable self-regulations, parameter sets and initial variable conditions.

The reason for condition (iii) can be intuitively understood based on the the competition between different oscillatory modes. It is known that NFLs can support self-sustained oscillations while PFLs alone can not [3,4,9]. If there are one PFL and one NFL in a TLS and all the nodes of the PFL are included in the NFL, the PFL is completely controlled by the NFL. Therefore, the PFL can not essentially influence the oscillation of the NFL, and the TLS can not yield effective oscillatory competition to generate chaos.

All 3-node and 4-node TLSs which satisfy conditions (i) and (ii) while violate condition (iii) are listed in Fig.4. For these 20 TLSs, above  $10^8$  random tests are made for each one by changing self-regulations, initial conditions and all the parameters. Chaos is not observed among any of them. The regular rhythmic subnetworks of Fig.4 may permit some advantages on various important biological functions. Some of these structures may appear in certain biological processes to keep the rhythmicity regular, and it is worthwhile introducing to biological experimental scientists the structures of Fig.4 in which chaos is entirely avoided.

The mechanism underlying condition (iv) is not yet clear. Competition between the two loops of chaotic motifs is essentially determined by the dynamics of the dual-input nodes (e.g., node 2 in Fig.1D, node 1 in Fig.2C, and so on). An interesting observation is that in all the 105 TLSs, each structure has only a single node regulated by two neighbor nodes, called as center node (all the other nodes in the structure receive only single inputs from cross interactions). We guess that the active and repressive regulations of center nodes may be favorable to strengthen the competition between the two loops, especially when the chaotic motifs contain one PFL and one NFL. It is emphasized that TLSs with two NFLs may generate two self-

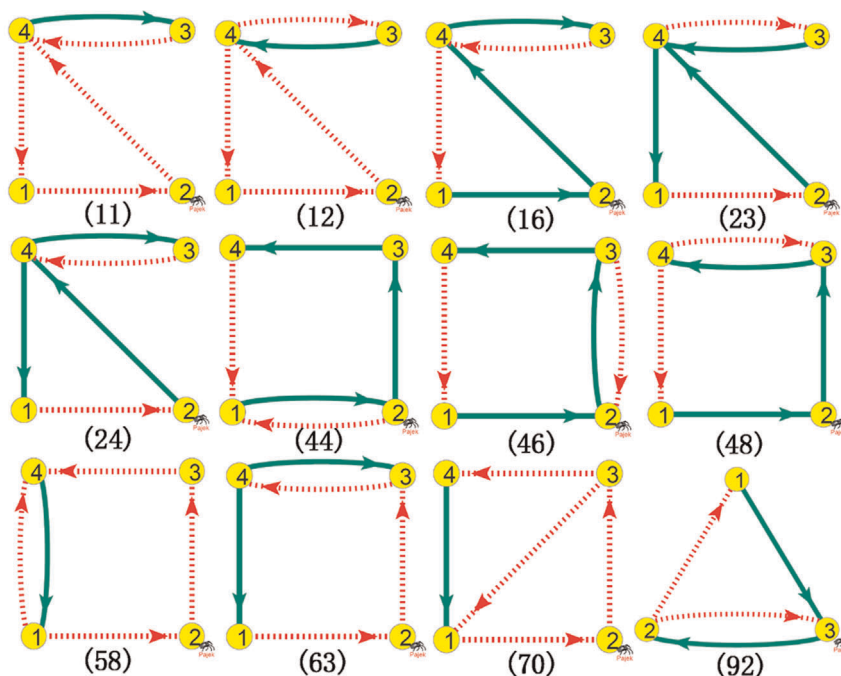

**Figure 3. Significant chaotic motifs.** By chaotic motifs, we mean that these GRNs can produce chaos with certain parameters, initial conditions and suitable self-regulations, and removal of any cross interaction in these GRNs can definitely terminate chaos. Chaotic motifs are the minimal and irreducible building blocks for chaotic motions in GRNs. Some significant motifs are shown with amount of chaotic realizations more than 100 in Table 3. There are four conditions (i)–(iv) for chaotic motifs. All these motifs possess two feedback loops (i), and at least one of them is NFL (ii). In all the motifs which contain one PFL and one NFL, the PFL must have at least one node not included in the NFL (iii). In most of the chaotic motifs, there is a node regulated by both repressive and active regulations (iv). If not, the motifs more often contain two NFLs.  
doi:10.1371/journal.pone.0039355.g003

sustainedly oscillatory modes which can more strongly compete to produce chaos, even if the double inputs of center nodes have same signs (motifs (11), (23) in Fig.3, and so on).

### Quantitative Analysis of Chaotic Motifs

In the above section, we explored chaotic motifs and explained heuristically the mechanism and structure underlying the characteristics of chaotic motifs. In this section, some quantitative analysis and description are made on chaotic GRNs. The basic idea is that: since chaos is due to the complicated competitions among various oscillatory modes and the intricate drivings among different nodes, it is crucial to explore the driving relationships in GRNs quantitatively. Therefore, we apply the concept of dominant phase-advanced driving (DPAD) [34,35] and extend the method of DPAD to DPAD time fraction (*DTF*). DPAD is a dynamical method that can find the strongest cross driving of the target node at any time instant when a system is in an oscillatory state, and *DTF* (ranged from 0 to 1) describes the driving contributions of all cross interactions to the target node during some given long period. The max value of *DTF* is one, which corresponds to there is only a single cross interaction to the target node; if the value is nearly zero, it means the driving effect of the given interaction to the target node is very weak. For the detail of these concepts, please refer to DPAD and *DTFs* in Materials and Methods.

### Chaotic Motifs Described by *DTFs*

It is remarkable that all the chaotic motifs discovered in Figs.1, 2 and 3 can be well explained by the driving relationships where the cross interactions are quantitatively described by *DTFs*. We reproduce the chaotic states of Figs.1C and 1F respectively, and

calculate the *DTFs* for all cross interactions which are depicted in Figs.5A and 5B. Two interesting features are observed: the interaction 3→1 (blue line in Fig.5A) has nearly zero *DTF* and the other cross interactions of Fig.5A (i.e., all the interactions in the chaotic motif of Fig.5B) have nearly 1.0 or comparable *DTFs*. The comparable *DTFs* of the interactions 1→2 and 3→2 in Fig.5B represent the competition between the two NFLs of 2→1→3→2 and 2→1→2 in the chaotic motif of Fig.5B, the key reason for chaos generation. The observations of Figs.5A and 5B quantitatively explain why the interaction 3→1 is not crucial for the chaotic behaviors of Figs.1B and 1C and why all the interactions in the chaotic motif of Fig.1D are irreducible for chaotic motions.

In Figs.5C–5E, we do exactly the same as Figs.5A and 5B with the chaotic states of Figs.2G–2I considered. The deleted interactions from Fig.5C to Fig.5D (1→2 and 3→2, blue lines in Fig.5C) possess near zero *DTFs*, therefore, they have little effect on the chaotic motion of Fig.2G. Note that, the two interactions 1→3 and 2→3 in Fig.5D have comparable *DTFs*. The chaotic motif of Fig.5E (i.e., motif (67) in Fig. S1) is obtained by removing the interaction 1→3, while another motif (motif (22) in Fig. S1) can be also found after removal of 2→3. Conversely, the interactions of 2→1 and 3→1 in Fig.5D are both important for chaos (for yielding competition between two loops), and discarding any of them can definitely destroy competition and thus suppress chaos. The reasons are: there is only one loop in the GRN after removal of 3→1 (breaking condition (i)), and all the nodes of the PFL are included in the NFL after deleting 2→1 (breaking condition (iii)). Chaotic motions can be thus definitely destroyed in both cases.

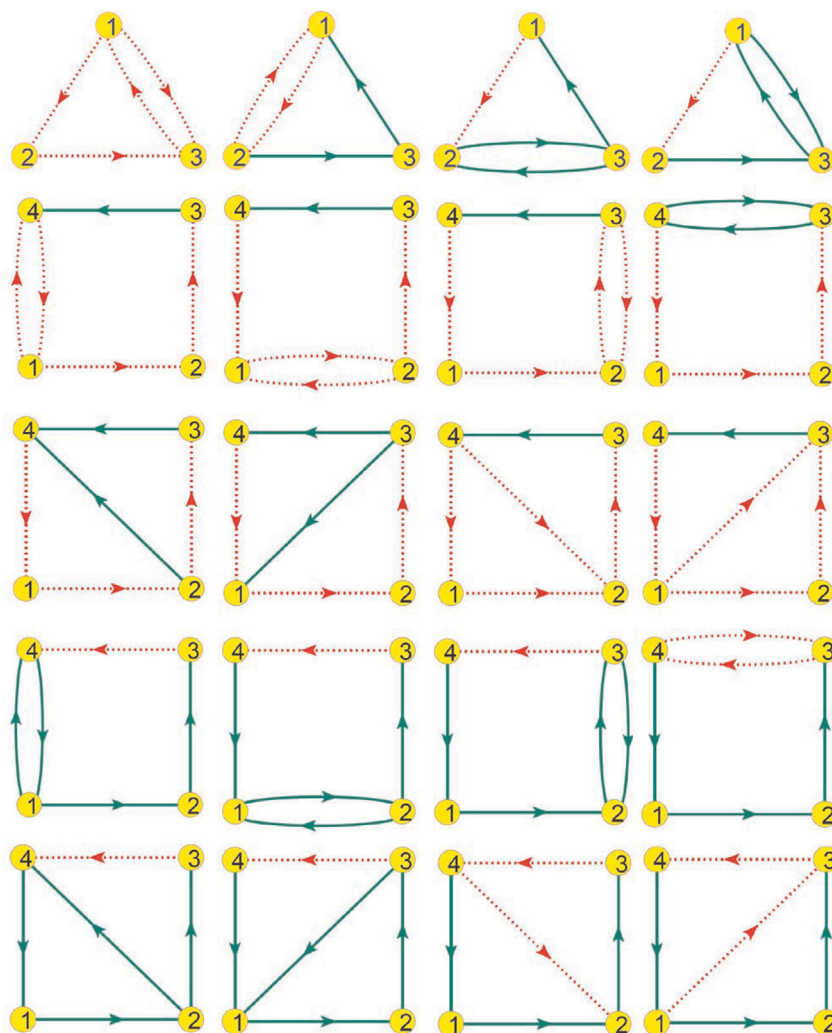

**Figure 4. Regular rhythmic TLs.** All 3-node and 4-node TLs, which fulfill conditions (i) and (ii) while violate condition (iii), can never produce chaos. The competition between the two feedback loops in each GRN does not work for chaos due to the fact that the PFLs are completely controlled by the corresponding NFLs. Therefore, all these TLs can never produce chaos. For each of these TLs, more than  $10^8$  random tests are made by varying self-regulations, parameter sets and initial conditions, and none of these tests yields chaos. These structures may bring some advantages on rhythmic functions, avoiding the chaotic disturbances definitely.  
doi:10.1371/journal.pone.0039355.g004

### Differences of *DTF* Distributions between Chaotic Motions and Limit Cycles

Besides, it is also interesting to study some distinct differences between simple periodic oscillations and chaotic motions by applying the method of *DTF*. We have a large amount data of limit cycle solutions and chaotic states in TLs. In Figs.6A and 6B, we show two 4-node TLs exhibiting simple periodic oscillations in Figs.6E and 6F. The *DTFs* of the two states are depicted in Figs.6A and 6B. Obviously, the interactions with large *DTFs* form single loops ( $1 \rightarrow 4 \rightarrow 2 \rightarrow 1$  in Fig.6A and  $1 \rightarrow 2 \rightarrow 4 \rightarrow 1$  in Fig.6B) and dominate other nodes and the whole networks. Since single strong oscillatory circuit can never produce chaos, the *DTF* structures of Figs.6A and 6B well explain the periodic behaviors of Figs.6E and 6F. In contrast, the other two 4-node TLs of Figs.6C and 6D show chaotic motions in Figs.6G and 6H. In Figs.6C and 6D, it is observed that there exist two effective loops with comparative *DTF* intensities and some common nodes (node 4 in Fig.6C and node 2 in Fig.6D) are driven by two competitive cross

interactions (one positive and the other negative). These competitions lead to chaotic motions in Figs.6G and 6H.

### Statistics of Chaotic Motifs in Chaotic GRNs

In the above discussion, chaotic motifs are defined as the minimal and irreducible building blocks for chaotic motions in GRNs. By analyzing the structures of the chaotic GRNs in Table 2, we discover that all the chaotic GRNs have at least one chaotic motif listed in Table 3 and often coupled by multiple chaotic motifs, which together determine dynamics of the networks. Therefore, in the perspective of functional dynamics, a chaotic motif is the necessary condition for chaotic GRNs. Then, we suspect that some optimal motifs may cause chaos with atypically high probability. To confirm this conjecture, we do the following statistical analysis.

For any given GRN, we can find all the TLs embedded in it. An example of such computation is shown in Fig.8 in Materials and Methods. Accordingly, for a given set of many GRNs, we can sum up the frequency of each embedded TLs, and can compute

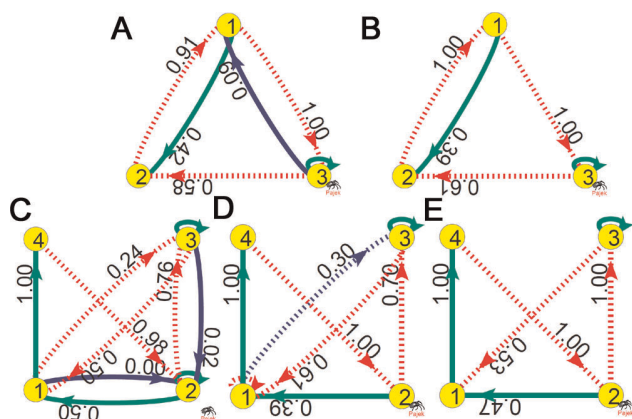

**Figure 5. Chaotic motifs described by DTFs.** DTF distributions of the chaotic GRNs of Figs.1 and 2. A for Fig.1A; B for Fig.1D; C for Fig.2A; D for Fig.2B; E for Fig.2C. The numbers associated to all cross interactions indicate the DTFs of Eq.(7). The total period of measurement is about 100 cycles of chaotic orbits. It is shown that most of the interactions reducible for chaos have almost zero DTFs, while all the interactions irreducible for chaos in the chaotic motifs in Fig.1D and Fig.2C have sufficiently large DTFs. Note that, the two interactions 1→3 and 2→3 in D have comparable DTFs. Discarding different one of them can construct different chaotic motifs (motifs (22) and (67) in Fig. S1 by discarding 2→3 and 1→3, respectively). On the other hand, both the interactions of 2→1 and 3→1 in D are important for the competition between the two loops and thus essential for chaos. There is only one loop in the GRN after removal of 3→1 (breaking condition (i)); and the PFL is included in the NFL after deletion of 2→1 (breaking condition (iii)), and both of the two operations can securely suppress chaotic motions.  
doi:10.1371/journal.pone.0039355.g005

the relative frequencies of all the 3-node and 4-node TLSs, defined by.

$$F_i = \frac{N_i}{N_{\text{average}}} = \frac{N_i}{\frac{N_{\text{total}}}{M}}, \quad (1)$$

where  $N_i$  represents the frequency of the  $i$ th TLS appearing in the given set of GRNs,  $N_{\text{total}}$  is the total frequency of all TLSs in the set (for 3-node case,  $N_{\text{total}} = \sum_{i=1}^{105} N_i$ ,  $M = 19$ ; and for 4-node case,  $N_{\text{total}} = \sum_{i=1}^{86} N_i$ ,  $M = 86$ ). It should be noted that the  $F_i$  is 1 for each TLS in randomly constructed  $n$ -node GRNs with  $n \geq 4$ .

By the above definition, we can get different  $F$  statistics for all TLSs by selecting different sets of GRNs. First, we choose all the chaotic samples of 4-node and 5-node GRNs in Table 2 as given sets, and get the relative frequencies under the original topologies of the chaotic samples, which is denoted by  $F_i^T$ . Then, we define dynamically reduced networks, which are obtained by deleting all the unimportant interactions with  $DTFs < 0.10$  in original topologies of the chaotic samples. The corresponding relative frequencies are defined as  $F_i^D$ . The results of  $F_i^T$  and  $F_i^D$  of chaotic GRNs discovered in Table 2 are shown in Figs.7A (4-node chaotic GRNs) and 7B (5-node chaotic GRNs), where black squares denote  $F_i^T$  while red cycles  $F_i^D$ .  $F_i^T > 1$  represents that the  $i$ th TLS appears in chaotic GRNs more frequently than the average, and the larger  $F_i^T$  is, the more significantly relevant to chaotic dynamics the  $i$ th TLS is. The results of  $F_i^D$  play more important role in characterizing the relevance of given TLSs with chaotic dynamics.

There are usually many feedback loops (far more than two loops) in chaotic GRNs, and the competitions among these loops

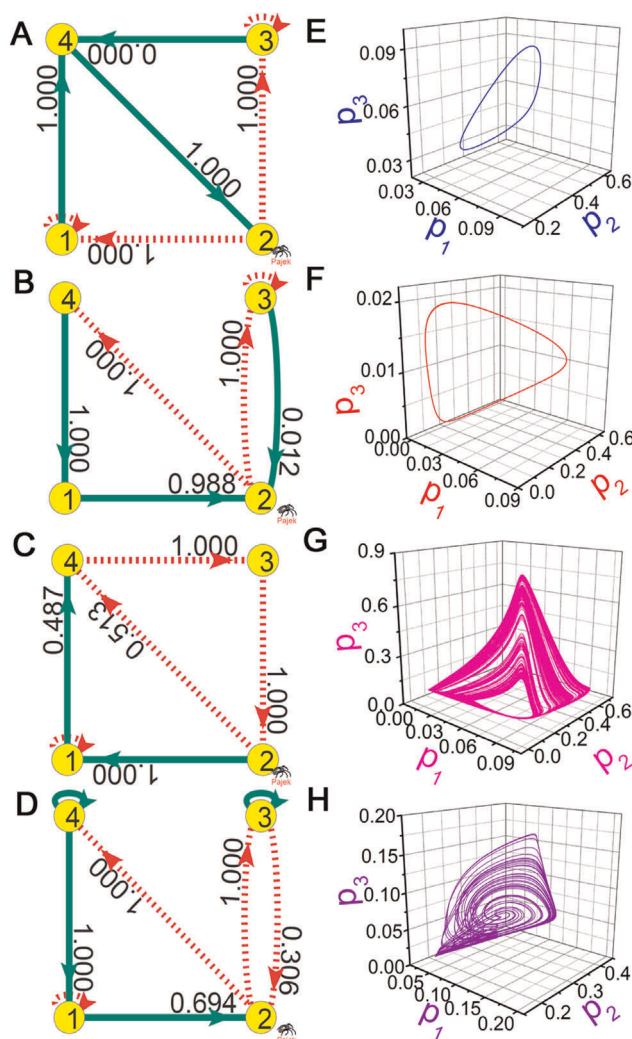

**Figure 6. Different DTF distributions in chaos and limit cycles.** A, B: Two periodically oscillatory TLSs. C, D: Two 4-node chaotic motifs. E, F: limit cycle solutions of A and B. E with  $K = 0.185, h = 4.00$  for A; F with  $K = 0.050, h = 5.00$  for B. G, H: Chaotic solutions of C and D. G with  $K = 0.065, h = 5.50$  for C; H with  $K = 0.095, h = 1.35$  for D. DTFs of the corresponding states are labeled on all the cross interactions of the GRNs A-D. It is demonstrated that, there are single effective loops (1→4→2→1 in A and 1→2→4→1 in B) which dominate the oscillation of limit cycles while the two feedback loops possess comparable DTFs to common nodes (node 4 in C and node 2 in D) in chaotic states.  
doi:10.1371/journal.pone.0039355.g006

to produce chaos turn out to be very complicated. The significant motifs effectively producing chaos (shown in Fig.3) are remarked in Fig.7. It is shown clearly that most of the motifs have significant  $F_i^T$  and  $F_i^D$ . These observations indicate that these significant motifs can most frequently appear in chaotic GRNs and function as the driving sources of chaos. Besides, most of these motifs contain two NFLs. Motifs with two NFLs may easily produce at least two self-sustainedly oscillatory modes in their networks, therefore, the competition between them may easily yield chaos.

It is remarkable that among all the TLSs with  $F_i^D > 1.5$  in Figs.7A and 7B, 88.5% (84.6%) of them are chaotic motifs in Table 3. While among the ones with  $F_i^D < 1.0$ , 37.5% (34.4%) of them are chaotic motifs. All these show the importance of the chaotic motifs in Table 3 to chaotic motions in GRNs.





By simply considering Gaussian white noise on above motifs, we find that all the oscillatory and chaotic phenomena observed in the paper are robust against small noise. However, relatively large noise may induce some interesting and unexpected results. Increasing noise may totally suppress chaos and result in noisy steady state. In particular, the effects of same noise on different nodes can be different, depending on the network structures or something else (still not fully understood). Moreover, limit cycles are much more robust against noise than chaotic attractors. However, we still can not declare that there is no chaos in GRN, because it is not easy to evaluate the strength of noise. In the next step, we will systemically investigate the effects of noises on dynamical behaviors of GRNs, and combine some experimental data to find whether chaotic motifs have realistic effects on the function of living systems.

We hope that the findings in the present work may give some impacts on the investigation of extremely rich behaviors of nonlinear dynamics and pattern formation in various biochemical systems, and contribute to exploring mystery biological functions and effects caused by chaotic regulatory networks.

## Materials and Methods

### Model

In this paper, we discuss the chaotic dynamics of few-node autonomous GRNs by using a model of ODEs. The main conclusions of this article do not depend on the detail of the model, and can be extended to a class of models with monotonic regulatory functions. We use the following simplified genomic regulatory model [12,13,34,41,42].

$$\frac{dp_i}{dt} = f_i(\mathbf{p}) - p_i,$$

$$f_i(p) = \begin{cases} A_i(\mathbf{p}) & \text{Active regulation only,} \\ R_i(\mathbf{p}) & \text{Repressive regulation only,} \\ A_i(\mathbf{p})R_i(\mathbf{p}) & \text{Joint regulation,} \end{cases}$$

$$(\mathbf{p}) = (p_1, p_2, \dots, p_N),$$

$$A_i(\mathbf{p}) = \frac{act_i^h}{act_i^h + K^h}, R_i(\mathbf{p}) = \frac{K^h}{rep_i^h + K^h},$$

$$act_i = \sum_{j=1}^N \alpha_{ij} p_j, rep_i = \sum_{j=1}^N \beta_{ij} p_j (i, j = 1, 2, \dots, N) \quad (2)$$

where  $p_i$  is the expression level of gene  $i$ ,  $0 < p_i < 1$ . The adjacency matrix  $\alpha_{ij}, \beta_{ij}$  determine the network structure of the system, which are defined in such a way that  $0 < \alpha_{ij} < 1$  if gene  $j$  activates gene  $i$ ,  $0 < \beta_{ij} < 1$  if gene  $j$  inhibits gene  $i$  and  $\alpha_{ij} = \beta_{ij} = 0$  for no regulation of gene  $i$  by gene  $j$ . For convenience, all the corresponding  $\alpha$  or  $\beta$  in Figs.1 and 2 are set to 1.0.  $act_i$  ( $rep_i$ ) represents the sum of active (repressive) transcriptional factors to node  $i$ . The regulatory interactions of genes are represented by Hill functions with the cooperativity exponent  $h$  ( $1.0 < h < 10.0$ ) and the activation coefficient  $K$  ( $0.005 < K < 0.30$ ), characterizing many real genetic systems. The model is of no-delay monotonous regulation. We

neglect the leakage transcription rate, and the degradation rates of different proteins are identical.

Searching for chaos: (i) In Table 1, network structures are randomly generated but to make sure that each node in the network has at least one input and at least one output (all the nodes are linked together). All the parameters  $\alpha(\beta)$ ,  $K$  and  $h$  are randomly given within their ranges. (ii) In Table 2, to enlarge the chaotic samples, oscillatory network structures in Table 1 are used to search for chaos.  $\alpha(\beta)$  of corresponding networks are remained,  $K$  and  $h$  are randomly given. (iii) In Table 3, chaotic samples are searched among the 105 TLSs with  $\alpha(\beta)$ ,  $K$  and  $h$  given randomly.

### DPAD and DTFs

The idea to make the DPAD analysis is that any single node of a GRN (node  $i$  for example) can not oscillate individually, and it can oscillate only through the driving of cross interactions from other nodes in the network. At any time instant ( $t \rightarrow t + \Delta t$ ), node  $i$  undergoes the cross driving  $\Delta f_{i(c)}$ ,

$$\frac{dp_i}{dt} = f_i(\mathbf{p}) - p_i,$$

$$\Delta f_{i(c)} = \sum_{j=1, j \neq i}^N \frac{\partial f_i}{\partial p_j} \frac{dp_j}{dt} \Delta t = \sum_{j=1, j \neq i}^N \frac{\partial f_i}{\partial p_j} \Delta p_j. \quad (3)$$

In the total cross driving signal of node  $i$ , the fraction of the contribution from node  $j$  over  $\Delta f_{i(c)}$  can be computed.

$$F_{i \leftarrow j} = \frac{\Delta f_{i \leftarrow j}}{\Delta f_{i(c)}} = \frac{\frac{\partial f_i}{\partial p_j} \Delta p_j}{\Delta f_{i(c)}}, j \neq i. \quad (4)$$

All the cross interactions to node  $i$  ( $\Delta f_{i \leftarrow j}, j \neq i$ ) can be classified into two distinct types: one is favorable to the cross driving ( $F_{i \leftarrow j} > 0$ ) while the other not ( $F_{i \leftarrow j} < 0$ ). We can define the former as ‘‘phase-advanced drivings’’ (PADs) while the latter ‘‘phase-delayed drivings’’. A node may be driven by a number of PADs among which a single PAD can be found providing the largest  $F_{i \leftarrow j}$  value to  $\Delta f_{i(c)}$ . This most important PAD is called DPAD which can be calculated at any time instant. We can quantitatively compute the DPAD contribution of any node  $j$  to the target node  $i$  at a time step  $t_q$ ,

$$D_{i \leftarrow j}(t_q) = \begin{cases} 1, & \text{if node } j \text{ is DPAD of node } i, \\ 0, & \text{otherwise.} \end{cases} \quad (5)$$

Now, we define a DPAD weighted time interval of node  $i$  as.

$$\Delta T_i(q) = |\Delta f_{i(c)}(t_q)|, \quad (6)$$

with  $\Delta f_{i(c)}(t_q)$  being taken at the time interval  $t_q$ . Then, we can further measure DPAD time fraction ( $DTF_{ij}$ ) for a given interaction from node  $j$  to play the role of DPAD on the driven node  $i$  over certain long time ( $M$  time steps, 100 cycles in our measurement)

$$DTF_{ij} = \frac{T_{i \leftarrow j}}{T_i} = \frac{\sum_{q=1}^M D_{i \leftarrow j} \cdot \Delta T_i(q)}{\sum_{q=1}^M \Delta T_i(q)}, \quad (7)$$

$T_i$  is the total measuring weighted time of node  $i$ , while  $T_{i \leftarrow j}$  represents the sum of weighted time interval in  $T_i$  when the interaction from node  $j$  to node  $i$  plays the role of DPAD (i.e., all  $\Delta T_j(q)$  when  $\Delta f_{i \leftarrow j}$  is DPAD).  $DTF_{ij}$  measures the contribution of node  $j$  in driving node  $i$  to oscillation quantitatively.

### The Detailed Course of the Statistical Method

A randomly constructed GRN of Fig.8A is considered as an example to show how to compute all the TLSs a GRN contains. Obviously, there are two 4-node TLSs (Figs.8B and 8C) and three 3-node TLSs (Figs.8D–8F) embedded in the GRN of Fig.8A. All the 105 TLSs in Fig. S1 are taken into account in our counting. Similar analysis can be also made on a large number of GRNs, and the relative frequencies in Eq.(1) of the 105 TLSs appearing in these GRNs can be computed.

### References

- Glass L, Mackey MC (1988) From Clocks to Chaos: The Rhythms of Life. (Princeton University Press, Princeton, NJ).
- Goldbeter A (1996) Biochemical Oscillations and Cellular Rhythms. (Cambridge University Press, Cambridge, UK).
- Hasty J, McMillen D, Isaacs F, Collins JJ (2001) Computational studies of gene regulatory networks: in numero molecular biology. *Nat Rev Genet* 2: 268–279.
- Novak B, Tyson JJ (2008) Design principles of biochemical oscillators. *Nat Rev Mol Cell Biol* 9: 981–991.
- Goldbeter A (2002) Computational approaches to cellular rhythms. *Nature* 420: 238–245.
- Elowitz MB, Leibler S (2000) A synthetic oscillatory network of transcriptional regulators. *Nature* 403: 335–338.
- Tyson JJ, Novak B (2010) Functional motifs in biochemical reaction networks. *Annual Review of Physical Chemistry* 61: 219–240.
- Tyson JJ, Chen KC, Novak B (2003) Sniffers, buzzers, toggles and blinkers: dynamics of regulatory and signaling pathways in the cell. *Current Opinion in Cell Biology* 15: 221–231.
- Ferrell Jr JE, Tsai TYC, Yang Q (2011) Modeling the cell cycle: Why do certain circuits oscillate? *Cell* 144: 874–885.
- Gardner TS, Cantor CR, Collins JJ (2000) Construction of a genetic toggle switch in *escherichia coli*. *Nature* 403: 339–342.
- Ozbudak EM, Thattai M, Lim HN, Shraiman BI, van Oudenaarden A (2004) Multistability in the lactose utilization network of *escherichia coli*. *Nature* 427: 737–740.
- Tian XJ, Zhang XP, Liu F, Wang W (2009) Interlinking positive and negative feedback loops creates a tunable motif in gene regulatory networks. *Phys Rev E* 80: 011926.
- Tsai TYC, Choi YS, Ma W, Pomeroy JR, Tang C, et al. (2008) Robust, tunable biological oscillations from interlinked positive and negative feedback loops. *Science* 321: 126–129.
- Otto E R (1977) Chaos in abstract kinetics: Two prototypes. *Bulletin of Mathematical Biology* 39: 275–289.
- Leloup JC, Goldbeter A (1998) A model for circadian rhythms in *drosophila* incorporating the formation of a complex between the per and tim proteins. *Journal of Biological Rhythms* 13: 70–87.
- Decroly O, Goldbeter A (1982) Birhythmicity, chaos, and other patterns of temporal selforganization in a multiply regulated biochemical system. *Proceedings of the National Academy of Sciences* 79: 6917–6921.
- Leloup JC, Goldbeter A (1999) Chaos and birhythmicity in a model for circadian oscillations of the per and tim proteins in *drosophila*. *Journal of Theoretical Biology* 198: 445–459.
- Suguna C, Chowdhury KK, Sinha S (1999) Minimal model for complex dynamics in cellular processes. *Phys Rev E* 60: 5943.
- Goldbeter A, Gonze D, Houart G, Leloup JC, Halloy J, et al. (2001) From simple to complex oscillatory behavior in metabolic and genetic control

### Supporting Information

**The 105 TLSs.** All the chaotic motifs may possess the following two characteristic features: (i) They have two feedback loops (the fewest feedback loops); (ii) At least one of the two loops is NFL. We exhaustively search all 3-node and 4-node two-loop structures satisfying the above two conditions. Fig. S1 shows the complete set of all these 105 distinctive two-loop structures (TLSs).

### Supporting Information

**Figure S1 The 105 two-loop structures (TLSs).** Complete set of distinctive 3-node and 4-node TLSs satisfying conditions (i) and (ii), serve as possible candidates of chaotic motifs. All the 105 TLSs are listed (4-node (1)–(86) and 3-node (87)–(105)) with the corresponding indexes used in the text and other figures. (EPS)

### Acknowledgments

We would like to thank Dr. Malte J. Rasch for helpful comments and suggests on the manuscript.

### Author Contributions

Conceived and designed the experiments: GH Z. Zhang XH Z. Zheng . Analyzed the data: XH WY. Wrote the paper: GH XH. Performed computer simulations: Z. Zhang YQ. Contributed analysis tools/computer programming: GH Z. Zhang .

- networks. *Chaos: An Interdisciplinary Journal of Nonlinear Science* 11: 247–260.
- OLSEN LF, DEGN H (1977) Chaos in an enzyme reaction. *Nature* 267: 177–178.
- Hauser MJB, Olsen LF, Bronnikova TV, Schaffer WM (1997) Routes to chaos in the peroxidaseoxidase reaction: Period-doubling and period-adding. *J Phys Chem B* 101: 5075–5083.
- Bronnikova TV, Fed'kina VR, Schaffer WM, Olsen LF (1995) Period-doubling bifurcations and chaos in a detailed model of the peroxidase-oxidase reaction. *J Phys Chem* 99: 9309–9312.
- Larter R, Steinmetz CG (1991) Chaos via mixed-mode oscillations. *Philosophical Transactions of the Royal Society of London Series A: Physical and Engineering Sciences* 337: 291–298.
- Zhang D, Gyorgyi L, Peltier WR (1993) Deterministic chaos in the belousov–zhabotinsky reaction: Experiments and simulations. *Chaos: An Interdisciplinary Journal of Nonlinear Science* 3: 723–745.
- Gyorgyi L, Field RJ (1992) A three-variable model of deterministic chaos in the belousovzhabotinsky reaction. *Nature* 355: 808–810.
- Gyorgyi L, Field RJ (1989) Aperiodicity resulting from two-cycle coupling in the belousov–zhabotinskii reaction. iii. analysis of a model of the effect of spatial inhomogeneities at the input ports of a continuous-flow, stirred tank reactor. *The Journal of Chemical Physics* 91: 6131–6141.
- Kappler K, Edwards R, Glass L (2003) Dynamics in high-dimensional model gene networks. *Signal Processing* 83: 789–798.
- Alon U (2007) Network motifs: theory and experimental approaches. *Nat Rev Genet* 8: 450–461.
- Milo R, Shen-Orr S, Itzkovitz S, Kashtan N, Chklovskii D, et al. (2002) Network motifs: Simple building blocks of complex networks. *Science* 298: 824–827.
- Mangan S, Alon U (2003) Structure and function of the feed-forward loop network motif. *Proceedings of the National Academy of Sciences* 100: 11980–11985.
- Yeger-Lotem E, Sattath S, Kashtan N, Itzkovitz S, Milo R, et al. (2004) Network motifs in integrated cellular networks of transcriptionregulation and protein-protein interaction. *Proceedings of the National Academy of Sciences of the United States of America* 101: 5934–5939.
- Sporns O, Kotter R (2004) Motifs in brain networks. *PLoS Biol* 2: e369.
- Zhigulin VP (2004) Dynamical motifs: Building blocks of complex dynamics in sparsely connected random networks. *Phys Rev Lett* 92: 238701.
- Ye W, Huang X, Huang X, Li P, Xia Q, et al. (2010) Self-sustained oscillations of complex genomic regulatory networks. *Physics Letters A* 374: 2521–2526.
- Qian Y, Huang X, Hu G, Liao X (2010) Structure and control of self-sustained target waves in excitable small-world networks. *Phys Rev E* 81: 036101.
- Pigolotti S, Krishna S, Jensen MH (2007) Oscillation patterns in negative feedback loops. *Proceedings of the National Academy of Sciences* 104: 6533–6537.

37. Pigolotti S, Krishna S, Jensen MH (2009) Symbolic dynamics of biological feedback networks. *Phys Rev Lett* 102: 088701.
38. Harris SL, Levine AJ (2005) The p53 pathway: positive and negative feedback loops 24: 2899–2908.
39. Trosko J, Ruch R (1998) Cell-cell communication in carcinogenesis. *Front Biosci* 3: d208–36.
40. Svetoslav N (2009) Complex oscillatory behaviour in a delayed protein cross talk model with periodic forcing. *Chaos, Solitons and Fractals* 42: 385–395.
41. Ishihara S, Fujimoto K, Shibata T (2005) Cross talking of network motifs in gene regulation that generates temporal pulses and spatial stripes. *Genes to Cells* 10: 1025–1038.
42. Kobayashi Y, Shibata T, Kuramoto Y, Mikhailov AS (2010) Evolutionary design of oscillatory genetic networks. *The European Physical Journal B - Condensed Matter and Complex Systems* 76: 167–178.
